# Supplementary material for: Changes in Registration Parameters for Ongoing Clinical Trials in Ukraine After 2022 Russian Invasion
Source: PubMed Central journal article supplement (PMC10293907; doi:10.1001/jamanetworkopen.2023.20202), 2023-06-26
Supplement: jamanetwopen-e2320202-s001.pdf [file jamanetwopen-e2320202-s001.pdf]

## Supplemental Online Content

Gujinović D, Viđak T, Melnikova M, Fortuna de Sousa NJ, Marušić A. Changes in registration parameters for ongoing clinical trials in Ukraine after 2022 Russian invasion. *JAMA Netw Open.* 2023;6(6):e2320202.  
doi:10.1001/jamanetworkopen.2023.20202

**eTable 1.** Characteristics of Participants' Recruitment in 888 *ClinicalTrials.gov* Trials Having Ukraine as the Only or One of Multiple Sites on 25 July 2022

**eTable 2.** Changes in The Recruitment Status Until 1 May 2023 Identified in 203 *ClinicalTrials.gov* Trials Conducted in Ukraine

**eTable 3.** Sub-Parameters Referring to a Particular Registration Parameter Within the *ClinicalTrials.gov* Archive Fields

This supplemental material has been provided by the authors to give readers additional information about their work.

**eTable 1. Characteristics of participants' recruitment in 888 *ClinicalTrials.gov* trials having Ukraine as the only or one of multiple sites on 25 July 2022**

| <b>Trial characteristics</b>                                                 | <b>No. (%) of trials</b> |
|------------------------------------------------------------------------------|--------------------------|
| <b>Recruitment Status:<sup>a</sup></b>                                       |                          |
| Active, not recruiting                                                       | 260 (29.3)               |
| Enrolling by invitation                                                      | 15 (1.7)                 |
| Not yet recruiting                                                           | 3 (0.3)                  |
| Recruiting                                                                   | 325 (36.6)               |
| Suspended                                                                    | 3 (0.3)                  |
| Terminated <sup>b</sup>                                                      | 232 (26.1)               |
| Unknown                                                                      | 42 (4.7)                 |
| Withdrawn                                                                    | 8 (0.9)                  |
| <b>Sample size:</b>                                                          |                          |
| Provided ≠ zero (median 348, 95% CI 300-379, IQR: 136-750, range 1-37000)    | 880 (99.1)               |
| Provided as zero                                                             | 8 (0.9)                  |
| <b>Gender:</b>                                                               |                          |
| Male                                                                         | 25 (2.8)                 |
| Female                                                                       | 51 (5.7)                 |
| Both                                                                         | 811 (91.3)               |
| Not provided                                                                 | 1 (0.1)                  |
| <b>Minimum age:</b>                                                          |                          |
| Provided (median 18, 95% CI: 18-18, IQR: 18-18, range: 1 minute-65 years)    | 857 (96.5)               |
| Not provided                                                                 | 31 (3.5)                 |
| <b>Maximum age:</b>                                                          |                          |
| Provided (median 74, 95% CI: 68.3-75, IQR: 55-80, range: 48 hours-130 years) | 404 (45.5)               |
| Not provided                                                                 | 484 (54.5)               |
| <b>Age group:</b>                                                            |                          |
| Adult                                                                        | 53 (6.0)                 |
| Adult/Older adult                                                            | 677 (76.2)               |
| Child/Adult/Older adult                                                      | 69 (7.8)                 |
| Child                                                                        | 64 (7.2)                 |
| Child/Adult                                                                  | 20 (2.3)                 |
| Older adult                                                                  | 5 (0.6)                  |

*Abbreviations:* CI, confidence interval; IQR, interquartile range.

<sup>a</sup> Data retrieved on 1 May 2023: Active, not recruiting (n = 261, 29.4%), Enrolling by invitation (n=12, 1.4%), Not yet recruiting (n=1, 0.1%), Recruiting (n=217, 24.4%), Suspended (n=1, 0.1%), Terminated (n=253, 28.5%), Unknown (n=45, 5.1%), Withdrawn (n= 8, 0.9%) and Completed (n=90, 10.1%).

<sup>b</sup>A total of 77 out of these 232 trials (33.2%) had at least one change a year before the war began until 24 Feb 2022, and 51 (22.0%) at least one change in the registration record between this date and 24 Feb 2023.

**eTable 2. Changes in the recruitment status until 1 May 2023 identified in 203 *ClinicalTrials.gov* trials conducted in Ukraine**

| <b>Recruitment status on July 25, 2022</b> | <b>Recruitment status on May 1, 2023</b> | <b>No. (%) of trials</b> |
|--------------------------------------------|------------------------------------------|--------------------------|
| Active, not recruiting                     | Completed                                | 61 (30.0)                |
| Recruiting                                 | Completed                                | 20 (9.9)                 |
| Unknown                                    | Completed                                | 4 (2.0)                  |
| Enrolling by invitation                    | Completed                                | 2 (1.0)                  |
| Not yet recruiting                         | Completed                                | 1 (0.5)                  |
| Terminated                                 | Completed                                | 1 (0.5)                  |
| Suspended                                  | Completed                                | 1 (0.5)                  |
| Recruiting                                 | Active, not recruiting                   | 77 (37.9)                |
| Enrolling by invitation                    | Active, not recruiting                   | 1 (0.5)                  |
| Active, not recruiting                     | Recruiting                               | 4 (2.0)                  |
| Suspended                                  | Recruiting                               | 1 (0.5)                  |
| Active, not recruiting                     | Terminated                               | 10 (4.9)                 |
| Recruiting                                 | Terminated                               | 10 (4.9)                 |
| Not yet recruiting                         | Terminated                               | 1 (0.5)                  |
| Suspended                                  | Terminated                               | 1 (0.5)                  |
| Recruiting                                 | Suspended                                | 1 (0.5)                  |
| Active, not recruiting                     | Unknown                                  | 2 (1.0)                  |
| Recruiting                                 | Unknown                                  | 5 (2.5)                  |

**eTable 3. Sub-parameters referring to a particular registration parameter within the *ClinicalTrials.gov* Archive fields**

| Parameters listed under “Complete list of historical versions” available within the CT.gov Tabular View | Sub-parameters listed when “Comparison Format” is chosen for two study record versions with different dates listed under “Complete list of historical versions”                                                                                                                                                                                            |
|---------------------------------------------------------------------------------------------------------|------------------------------------------------------------------------------------------------------------------------------------------------------------------------------------------------------------------------------------------------------------------------------------------------------------------------------------------------------------|
| <i>Study Identification</i>                                                                             | Unique Protocol ID, Brief Title, Official Title, Secondary IDs                                                                                                                                                                                                                                                                                             |
| <i>Study Status</i>                                                                                     | Record Verification, <i>Overall Status</i> , Study Start, Primary Completion, Study Completion, First Submitted, First Submitted that Met QC Criteria, First Posted, Last Update Submitted that Met QC Criteria, Last Update Posted, <i>Results First Submitted</i> , <i>Results First Submitted that Met QC Criteria</i> , <i>Results First Posted</i>    |
| <i>Recruitment Status</i>                                                                               | Sub-parameter <i>Overall Status</i> under parameter Study Status                                                                                                                                                                                                                                                                                           |
| <i>Sponsor/Collaborators</i>                                                                            | Sponsor, Responsible Party, Collaborators                                                                                                                                                                                                                                                                                                                  |
| <i>Oversight</i>                                                                                        | U.S. FDA-regulated Drug, U.S. FDA-regulated Device, Data Monitoring                                                                                                                                                                                                                                                                                        |
| <i>Study Description</i>                                                                                | Brief Summary, Detailed Description                                                                                                                                                                                                                                                                                                                        |
| <i>Conditions</i>                                                                                       | Conditions, Keywords                                                                                                                                                                                                                                                                                                                                       |
| <i>Study Design</i>                                                                                     | For interventional trials: Study Type, Primary Purpose, Study Phase, Interventional Study Model, Number of Arms, Masking, Allocation, Enrollment<br><br>For observational trials: Study Type, Observational Study Model, Time Perspective, Biospecimen Retention, Biospecimen Description, Enrollment, Number of Groups/Cohorts, Target Follow-Up Duration |
| <i>Arms and Interventions</i>                                                                           | Arms, Assigned Interventions                                                                                                                                                                                                                                                                                                                               |
| <i>Outcome Measures</i>                                                                                 | Primary Outcome Measures, Secondary Outcome Measures, Other Outcome Measures<br><br><i>In the Results Section<sup>a</sup></i> : Outcome Measure Information, Statistical Analyses, Statistical Analysis Overview, Comparison Group Selection, Type of Statistical Test, Statistical Test of Hypothesis, Method of Estimation, Other Statistical Analysis   |
| <i>Eligibility</i>                                                                                      | Minimum Age, Maximum Age, Sex, Gender Based, Accepts Healthy Volunteers, Criteria (Inclusion and Exclusion)                                                                                                                                                                                                                                                |
| <i>Contacts and Locations</i>                                                                           | Central Contact Person, Central Contact Backup, Locations                                                                                                                                                                                                                                                                                                  |
| <i>IPD Sharing</i>                                                                                      | Plan to Share IPD                                                                                                                                                                                                                                                                                                                                          |
| <i>References</i>                                                                                       | Citations, Links, Available IPD/Information                                                                                                                                                                                                                                                                                                                |
| <i>Document Section</i>                                                                                 | Study Protocol, Statistical Analysis Plan                                                                                                                                                                                                                                                                                                                  |
| <i>Results</i>                                                                                          | The first submission of results within the modules Participant Flow, Baseline Characteristics, Outcome                                                                                                                                                                                                                                                     |

|                                              |                                                                                                                                                                                                                              |
|----------------------------------------------|------------------------------------------------------------------------------------------------------------------------------------------------------------------------------------------------------------------------------|
|                                              | Measures, Adverse Events, Limitations and Caveats, and/or More Information<br>Sub-parameters <i>Results First Submitted, Results First Submitted that Met QC Criteria, Results First Posted</i> under parameter Study Status |
| <i>Participant Flow</i> <sup>a</sup>         | Recruitment Details, Pre-assignment Details, Arm/Group Information, Type of Units Assigned                                                                                                                                   |
| <i>Baseline Characteristics</i> <sup>a</sup> | Arm/Group Information, Baseline Analysis Population Information, Baseline Measure Information                                                                                                                                |
| <i>Adverse Events</i> <sup>a</sup>           | All-Cause Mortality, Serious Adverse Events, Other (Not Including Serious) Adverse Events                                                                                                                                    |
| <i>More Information</i> <sup>a</sup>         | Certain Agreement, Results Point of Contact                                                                                                                                                                                  |

<sup>a</sup>According to the *ClinicalTrials.gov* Results Data Element Definitions for Interventional and Observational Studies.
