# Supplementary material for: Changes in Registration Parameters for Ongoing Clinical Trials in Ukraine After 2022 Russian Invasion
Source: PubMed Central journal article supplement (PMC10293907; doi:10.1001/jamanetworkopen.2023.20202), 2023-06-26
Supplement: jamanetwopen-e2320202-s002.pdf [file jamanetwopen-e2320202-s002.pdf]

## Data Sharing Statement

Gujinović. Changes in Registration Parameters for Ongoing Clinical Trials in Ukraine After 2022 Russian Invasion. *JAMA Netw Open*. Published June 26, 2023.

doi:10.1001/jamanetworkopen.2023.20202

### Data

**Data available:** Yes

**Data types:** Data (not involving human participants)

**How to access data:** Available upon request from the first author, Dr Diana Gujinovic, [diana.gujinovic@mefst.hr](mailto:diana.gujinovic@mefst.hr). The data will also be posted in OSF after publication

**When available:** With publication

### Supporting Documents

**Document types:** None

### Additional Information

**Who can access the data:** Anyone requesting the data

**Types of analyses:** For any purpose

**Mechanisms of data availability:** Without investigator support
